# Supplementary material for: Association of Vitamin D in Different Trimester with Hemoglobin during Pregnancy
Source: MDPI journal article supplement (doi:10.3390/nu14122455), 2022-06-14
Supplement: s1 [file s1]

Supplementary Table S1. The association between 25(OH)D in second and third trimester and hemoglobin in different gestational age, respectively.

| Hemoglobin, g/L         | N   | Model 1     |                   | Model 2     |               | Model 3     |               | Model 4     |               |
|-------------------------|-----|-------------|-------------------|-------------|---------------|-------------|---------------|-------------|---------------|
|                         |     | β(se)       | <i>P</i>          | β(se)       | <i>P</i>      | β(se)       | <i>P</i>      | β(se)       | <i>P</i>      |
| 25(OH)D in T2           |     |             |                   |             |               |             |               |             |               |
| HB of GA from 23 to 27† | 516 | 0.06 (0.03) | 0.0790            | 0.05 (0.03) | <b>0.0400</b> | 0.06 (0.03) | <b>0.0131</b> | 0.06 (0.03) | <b>0.0131</b> |
| HB of GA from 28 to 31‡ | 320 | 0.14 (0.04) | <b>0.0007</b>     | 0.11 (0.03) | <b>0.0011</b> | 0.11 (0.04) | <b>0.0027</b> | 0.13 (0.04) | <b>0.0021</b> |
| HB of GA from 32 to 35‡ | 307 | 0.18 (0.04) | <b>&lt;0.0001</b> | 0.06 (0.03) | 0.0772        | 0.05 (0.04) | 0.1462        | 0.12 (0.05) | <b>0.0081</b> |
| HB of GA from 36 to 42‡ | 265 | 0.18 (0.05) | <b>0.0002</b>     | 0.08 (0.04) | <b>0.0277</b> | 0.07 (0.04) | 0.0654        | 0.11 (0.06) | <b>0.0658</b> |
| 25(OH)D in T3           |     |             |                   |             |               |             |               |             |               |
| HB of GA from 32 to 35  | 293 | 0.12 (0.04) | <b>0.0036</b>     | 0.07 (0.03) | <b>0.0185</b> | 0.06 (0.03) | <b>0.0416</b> | 0.06 (0.03) | <b>0.0416</b> |
| HB of GA from 36 to 42  | 247 | 0.17 (0.05) | <b>0.0002</b>     | 0.11 (0.04) | <b>0.0018</b> | 0.11 (0.04) | <b>0.0039</b> | 0.12 (0.04) | <b>0.0058</b> |

HB, hemoglobin; T1, first trimester; T2, second trimester; T3, third trimester; GA, gestational age.

Model 1 was adjusted for GA at HB measurement.

Model 2 was adjusted for age, gestational age at 25(OH)D measurement, gravity, parity, season at 25(OH)D measurement, pre-pregnancy BMI, smoking, drink and tea before pregnancy, sleep quality and physical frequency at GA of 25(OH)D measurement, gestational age and weight gain at the corresponding gestational age of HB measurement and baseline Hb.

Model 3<sup>†</sup> was further adjusted for iron Supplementary from T1 to T2; Model 3<sup>‡</sup> was further adjusted for iron Supplementary from T1 to T3.

Model 4 was adjusted for the variables in Model 3 but baseline Hb was HB of corresponding GA before and closest to 25(OH)D measurement.

Supplementary Table S2. The association between 25(OH)D in different trimesters and hemoglobin in different gestational age stratified by whether iron supplementary during pregnancy or not.

| Hemoglobin, g/L        | Iron supplementary during pregnancy before Hb measurement |          |              |               | <i>P</i> for interaction |
|------------------------|-----------------------------------------------------------|----------|--------------|---------------|--------------------------|
|                        | No                                                        |          | Yes          |               |                          |
|                        | $\beta$ (se)                                              | <i>P</i> | $\beta$ (se) | <i>P</i>      |                          |
|                        |                                                           |          |              |               |                          |
| 25(OH)D in T1          |                                                           |          |              |               |                          |
| HB at T1               | 0.04 (0.03)                                               | 0.1800   | 0.09 (0.03)  | 0.0034        | 0.1996                   |
| HB of GA from 14 to 17 | 0.00 (0.04)                                               | 0.9133   | -0.01 (0.03) | 0.7606        | 0.9190                   |
| HB of GA from 18 to 22 | 0.03 (0.04)                                               | 0.4713   | 0.06 (0.03)  | 0.0293        | 0.3681                   |
| HB of GA from 23 to 27 | 0.00 (0.04)                                               | 0.9009   | 0.07 (0.03)  | 0.0177        | 0.3685                   |
| HB of GA from 28 to 31 | 0.00 (0.06)                                               | 0.9970   | 0.10 (0.03)  | 0.0045        | 0.3970                   |
| HB of GA from 32 to 35 | 0.01 (0.06)                                               | 0.8476   | 0.06 (0.04)  | 0.0744        | 0.4019                   |
| HB of GA from 36 to 42 | -0.01 (0.08)                                              | 0.8979   | 0.09 (0.04)  | 0.0251        | 0.4130                   |
| 25(OH)D in T2          |                                                           |          |              |               |                          |
| HB of GA from 23 to 27 | 0.03 (0.05)                                               | 0.5870   | 0.09 (0.03)  | <b>0.0033</b> | 0.2360                   |
| HB of GA from 28 to 31 | 0.01 (0.08)                                               | 0.8832   | 0.12 (0.04)  | <b>0.0015</b> | 0.9161                   |
| HB of GA from 32 to 35 | 0.07 (0.08)                                               | 0.3370   | 0.05 (0.04)  | 0.2457        | 0.5099                   |
| HB of GA from 36 to 42 | 0.06 (0.10)                                               | 0.5163   | 0.07 (0.04)  | 0.0757        | 0.8900                   |
| 25(OH)D in T3          |                                                           |          |              |               |                          |
| HB of GA from 32 to 35 | 0.07 (0.05)                                               | 0.2204   | 0.08 (0.04)  | 0.0566        | 0.1000                   |
| HB of GA from 36 to 42 | 0.12 (0.07)                                               | 0.1045   | 0.15 (0.04)  | <b>0.0003</b> | 0.6040                   |

HB, hemoglobin; T, first trimester; T2, second trimester; T3, third trimester; GA, gestational age.

Model was adjusted for age, gestational age at 25(OH)D measurement, gravity, parity, season at 25(OH)D measurement, pre-pregnancy BMI, smoking, drink and tea before pregnancy, sleep quality and physical frequency at GA of 25(OH)D measurement, gestational age and weight gain at the corresponding gestational age of HB measurement and baseline Hb.
